# Supplementary material for: The QKI-6 RNA Binding Protein Regulates Actin-interacting Protein-1 mRNA Stability during Oligodendrocyte Differentiation
Source: PubMed Central journal article supplement — Mol Biol Cell. 2010 Sep 1;21(17):3029–40. doi: 10.1091/mbc.E10-04-0305 (PMC2929996; doi:10.1091/mbc.e10-04-0305), 2010-09-01

**Supplemental Figure 1. Rat OLs show decreased AIP-1 staining during early development.**

Rat pups sacrificed at postnatal day 0 (A), day 7 (B) or day 14 (C) were prepared for immunostaining for AIP-1, O4 and DAPI staining. OLs were identified with the O4 marker and images were taken in the cerebral cortex. Scale bars represent 50  $\mu\text{m}$ .

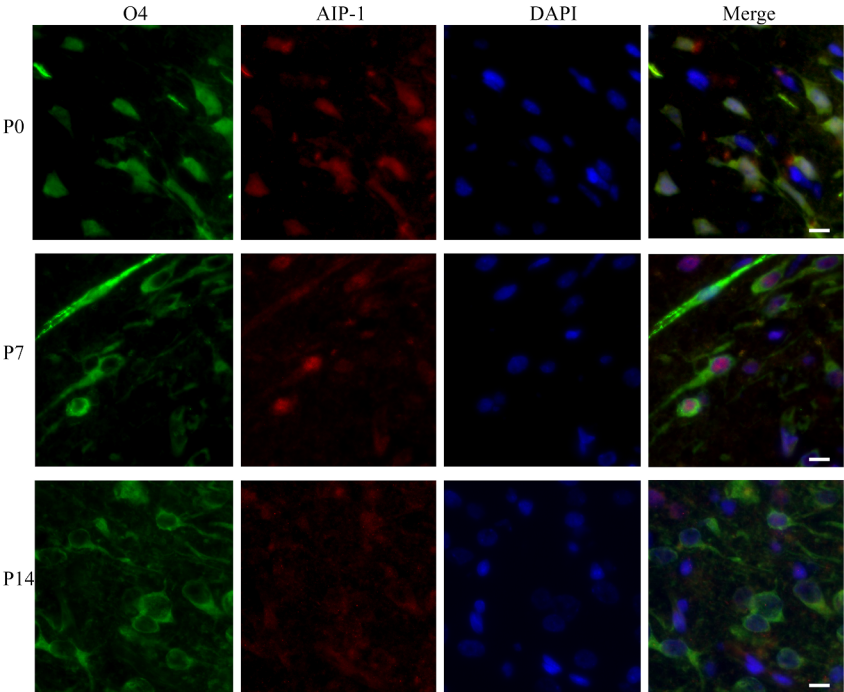

Supplement: E10-04-0305_1.pdf [file E10-04-0305_1.pdf]
